# Supplementary material for: Synthesis, crystal structure, lipophilicity, antioxidant activity, binding interactions, and antibacterial activity against methicillin-resistant Staphylococcus aureus of a Ni(ii) Schiff base complex: combined theoretical and experimental approaches
Source: Royal Society of Chemistry journal article supplement (doi:10.1039/d3nj05150a), 2024-01-01
Supplement: d3nj05150a1.pdf [file d3nj05150a1.pdf]

## Supporting Information

### Synthesis, Crystal structure, Lipophilicity, Antioxidant, Binding interaction and Antibacterial investigation against Methicillin-Resistant *Staphylococcus aureus* of Ni(II) Schiff base complex: Combined Theoretical and Experimental Approaches

Arpita Das<sup>a</sup>, Ribhu Maity<sup>b</sup>, Tuhin Sarkar<sup>c</sup>, Priyanka Das<sup>c</sup>, Paula Brandao<sup>d</sup>, Tithi Maity<sup>e</sup>, Keka Sarkar<sup>\*c</sup> and Bidhan Chandra Samanta<sup>\*b</sup>

<sup>a</sup>*Department of Physics, Mugberia Gangadhar Mahavidyalaya, Bhupatinagar, Purba Medinipur-721425, West Bengal, India.*

<sup>b</sup>*Department of Chemistry, Mugberia Gangadhar Mahavidyalaya, Bhupatinagar, Purba Medinipur-721425, West Bengal, India.*

<sup>c</sup>*Department of Microbiology, University of Kalyani, West Bengal, India*

<sup>d</sup>*Departamento de Química, CICECO, Universidade de Aveiro, 3810-193 Aveiro, Portugal*

<sup>e</sup>*Department of Chemistry, Prabhat Kumar College, Purba Medinipur-721401, Contai, West Bengal, India*

**\*Corresponding Author Email: [bidhansamanta@yahoo.in](mailto:bidhansamanta@yahoo.in)**

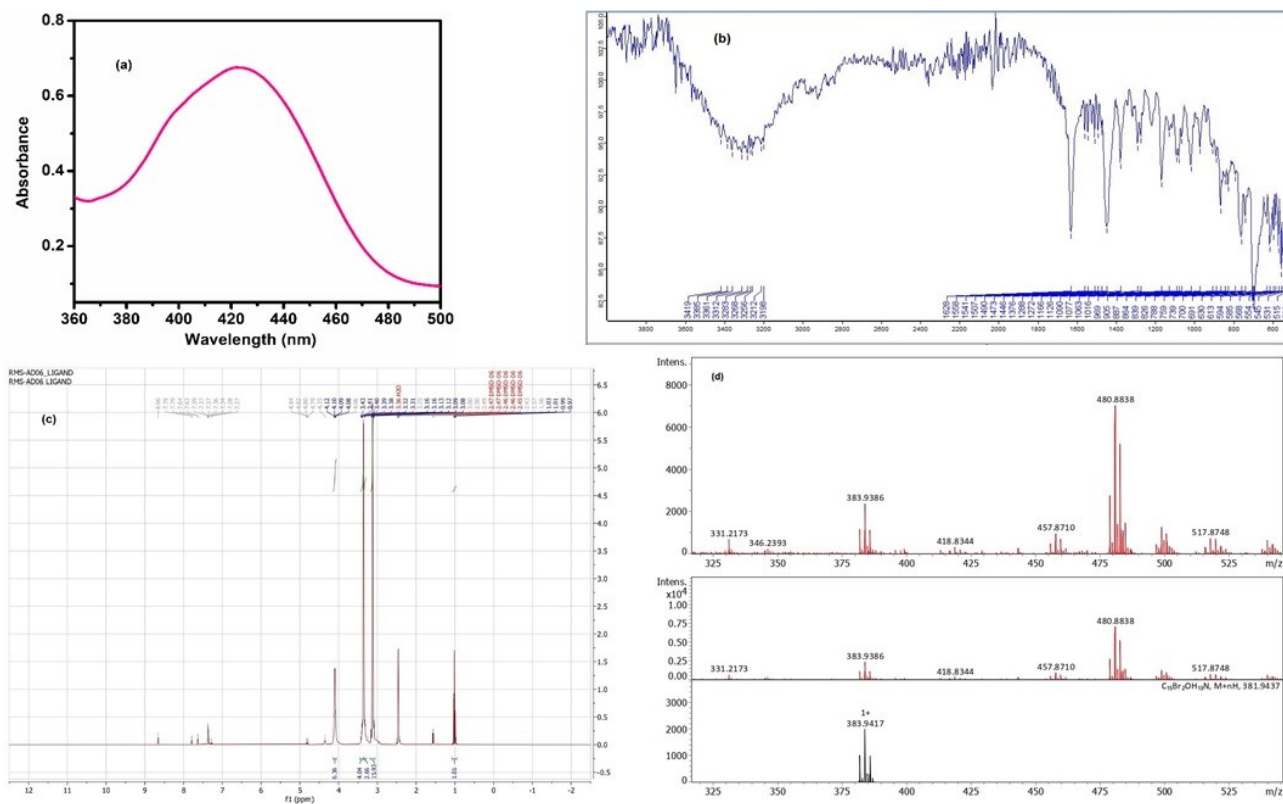

Figure S1 (a) UV-Vis, (b) FTIR and (c) <sup>1</sup>H NMR (d) Mass spectra of the ligand

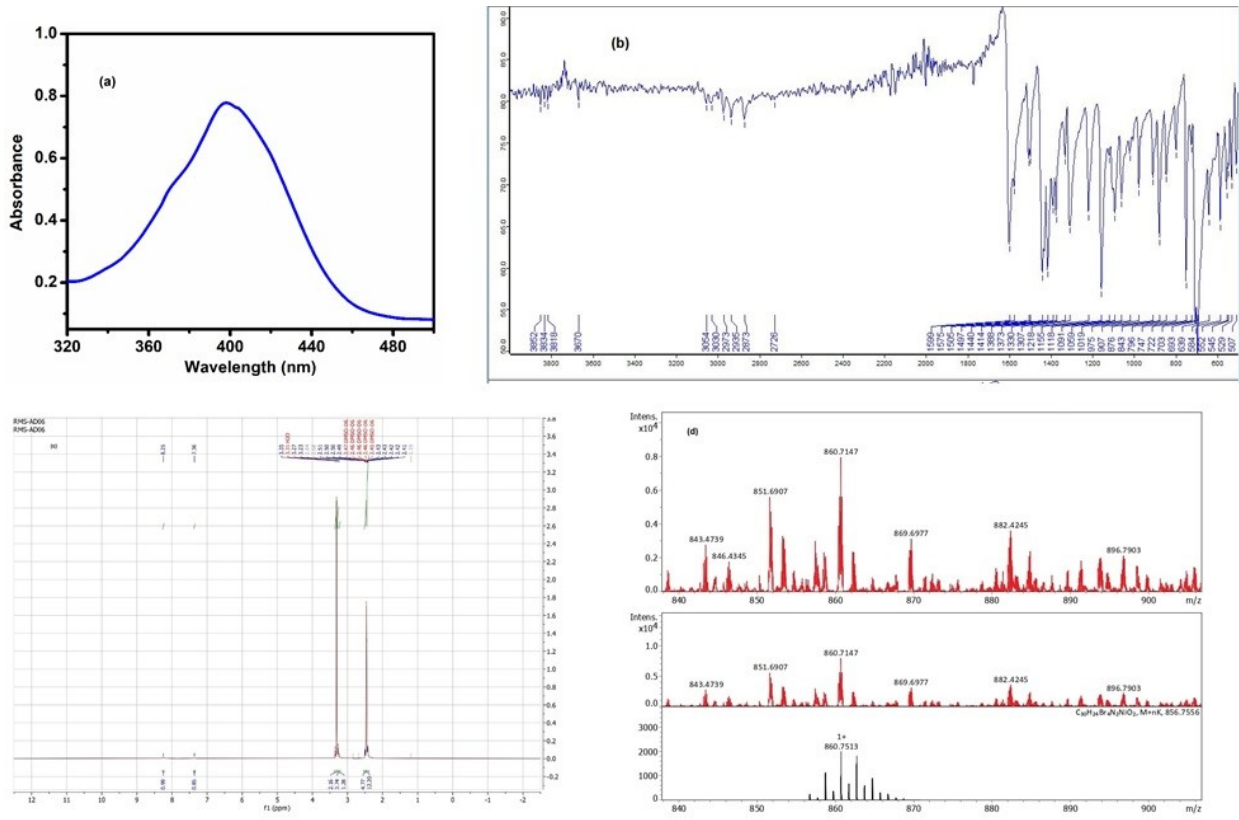

Figure S2 (a) UV-Vis and (b) FTIR (c)  $^1H$  NMR (d) Mass spectra of the complex

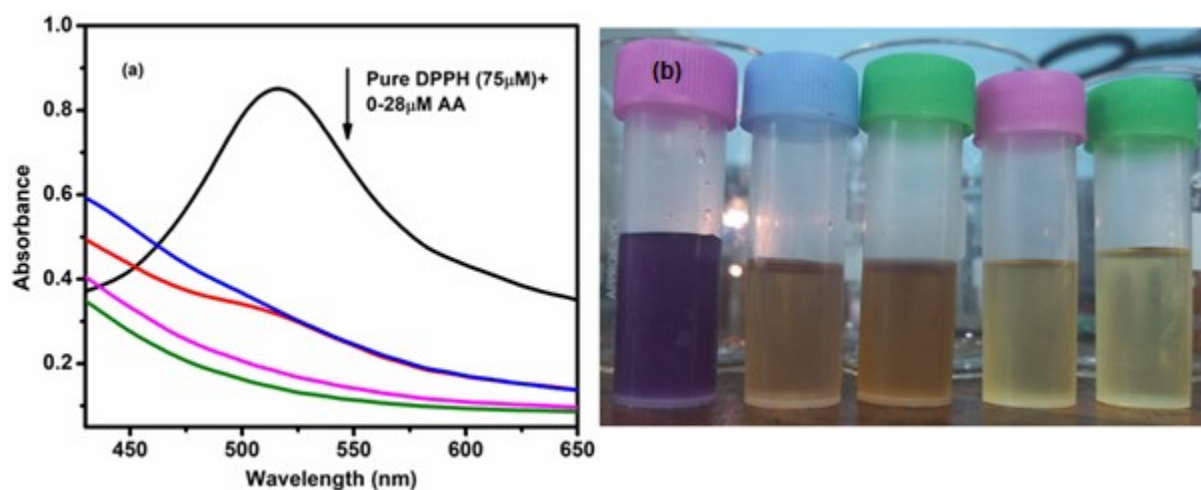

Figure S3 (a) Decrease in absorbance of DPPH with addition of ascorbic acid (b) Colour changes of pure DPPH solution with gradual addition of ascorbic acid

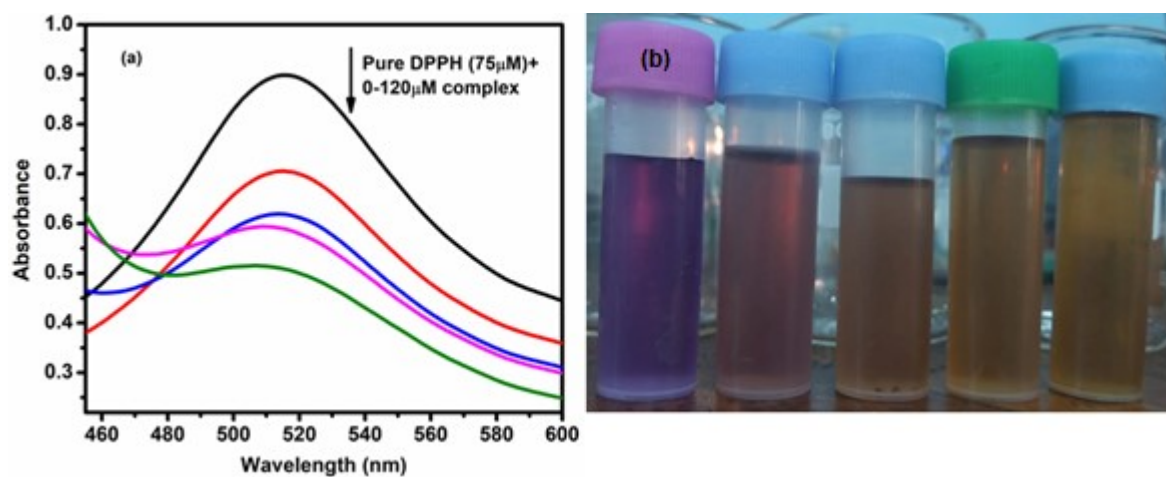

Figure S4 (a) Decrease in absorbance of DPPH with addition of complex (b) Colour changes of pure DPPH solution with gradual addition of complex

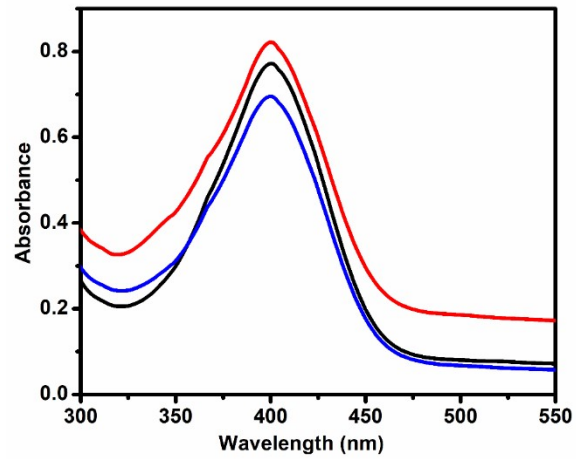

Figure S5 UV spectra of the complex at day 1, 7 and 14

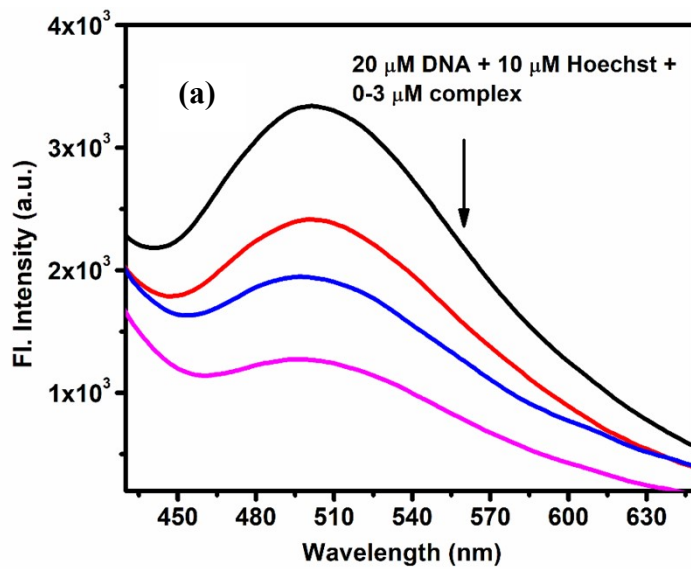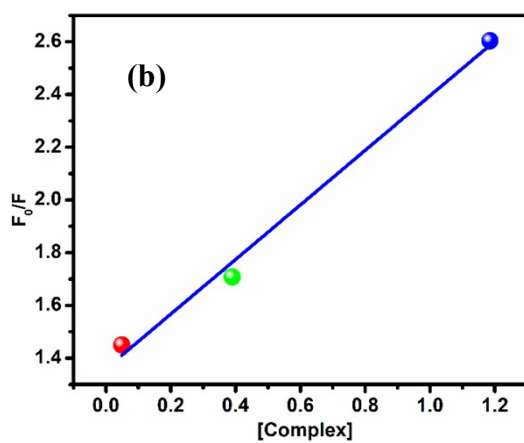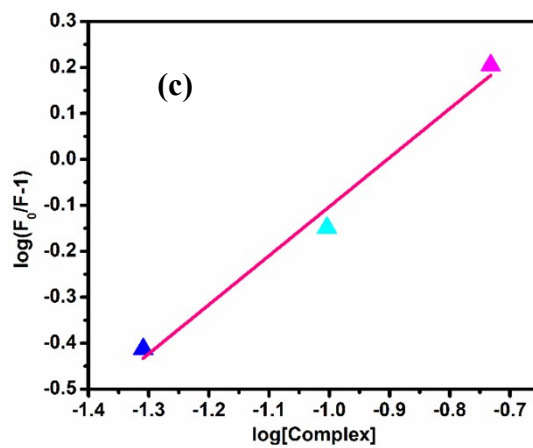

Figure S6 (a) Fluorescence quenching of DNA- Hoechst adduct by the complex (b) Stern Volmer plot (c) Scatchard plot at 303 K

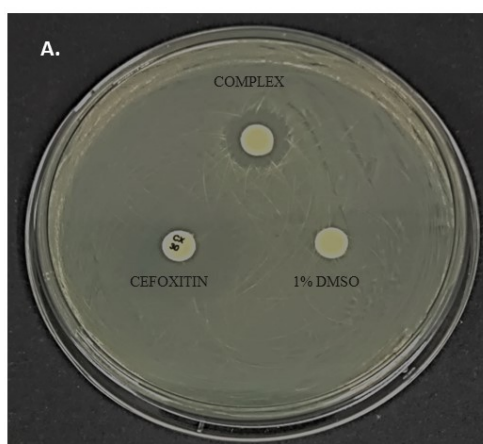

Figure S7 Antibacterial activity of complex against Gram positive MRSA through disc diffusion assay. Standard antibiotic Cefoxitin (cx30) and 1% DMSO was used as control. Complex shown a significant zone of inhibition (14mm) whereas control demonstrated the zone of inhibitions <6mm.

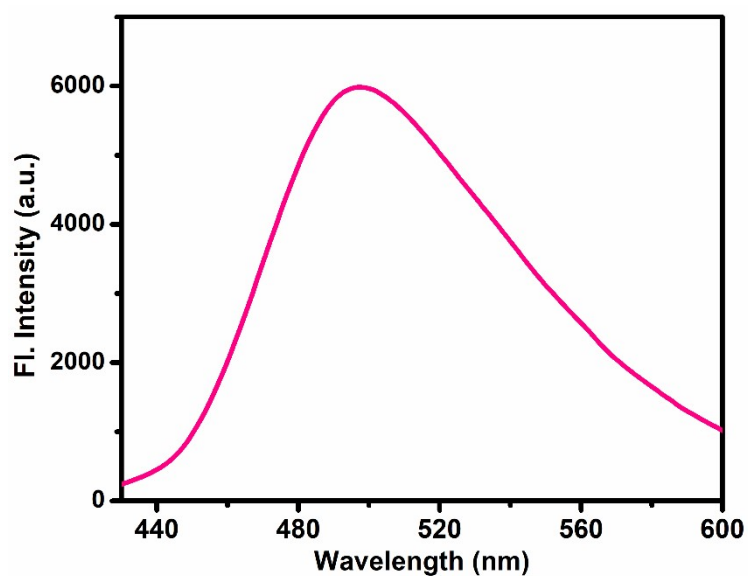

Figure S8 Fluorescence spectrum of the pure complex

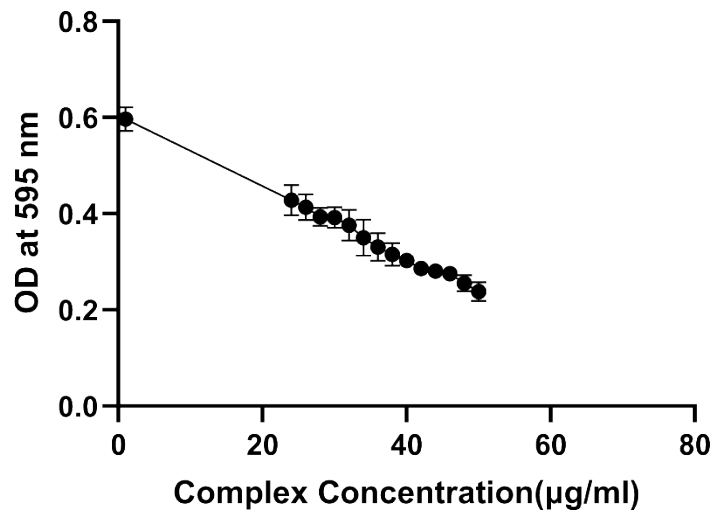

Figure S9 Determination of minimum inhibitory concentration (MIC) >50µg/ml of complex against KP (BAA1705)

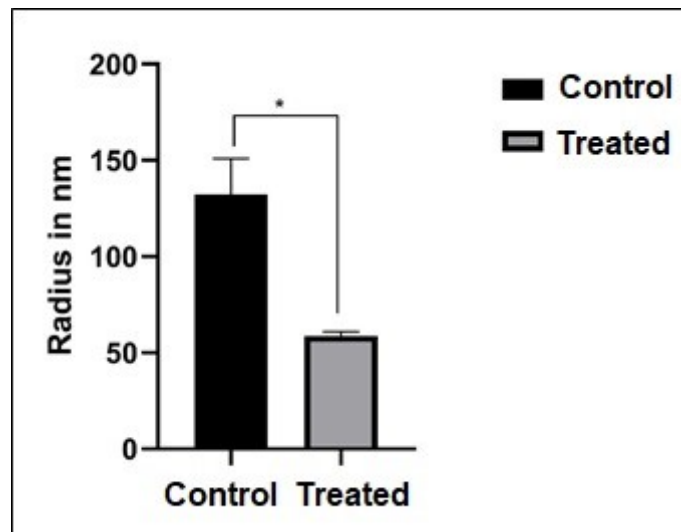

Figure S10 Quantification of cell radius for control before and after treated with complex. Treated MRSA cells shows reduce radius size than control cells. The radius was measured by ImageJ software. The data provided is the mean  $\pm$  standard deviation of triplicate experiments and statistically significant.

**Table S1** Bond distances (Å) and angles (°) for complex [Ni(L<sub>2</sub>)]

| <b>Bond lengths</b> |           | <b>Bond angles</b> |          |
|---------------------|-----------|--------------------|----------|
| Ni1-N1              | 2.017(7)  | N1-Ni1-N1i         | 115.8(4) |
| Ni1-N1i             | 2.017(7)  | N1-Ni1-O1          | 92.8(3)  |
| Ni1-O1              | 1.903(6)  | N1-Ni1-O1i         | 106.8(3) |
| Ni1-O1i             | 1.903(6)  | N1i-Ni1-O1         | 106.8(3) |
| Br1-C2              | 1.931(8)  | N1i-Ni1-O1i        | 92.8(3)  |
| Br2-C4              | 1.907(8)  | O1-Ni1-O1i         | 143.0(4) |
| N1-C7               | 1.274(12) |                    |          |
| N1-C8               | 1.485(11) |                    |          |

i=-x+1, y, -z+1
